# Supplementary material for: Oxford-Palestine (OxPal) partnership: evaluation of an online medical research fellowship aiming to build local research capacity
Source: Research Square preprint supplement (doi:10.21203/rs.3.rs-4228949/v1), 2024-04-12
Supplement: Supplementary file 1 [file db613b0d044b2525791e98d3.docx]

**Supplementary material**

**Supplementary material table 1: Lecture course structure**

| **Topic** | **Learning objectives** |
| --- | --- |
| Lecture 1: Introduction to medical research | Medical research: What, why, when and how |
| Lecture 2: Research proposal and Research funding | How to write a plan for research and formulate it into a proposal, how to access funding in oPt |
| Lecture 3: How to formulate your research question and how to do a literature review | Frameworks for research question formulation, techniques for literature review |
| Lecture 4: Ethics in biomedical research (including obtaining ethical approval) | History of ethics in biomedical research. IRB approval in the USA and Palestine |
| Lecture 5: Data Collection | Strengths/weaknesses of quantitative and qualitative methods of data collection |
| Lecture 6: Study Design | The process of designing a methodology to generate best evidence for the research question |
| Lecture 7: Data cleaning and descriptive analysis using SPSS | Data management, Data cleaning, Handling missing data, Descriptive statistics |
| Lecture 8: Descriptive statistics part 2 | How to create frequency tables using SPSS, exporting SPSS output to Microsoft Word, Interpretation of SPSS results |
| Lecture 9: Introduction to hypothesis testing and univariate analysis | Data types: continuous, binary, categorical, ordinal and counts. Hypothesis testing (P-values and confidence intervals). Parametric and non-parametric testing |
| Lecture 10: Academic writing 1: Preparing a scientific manuscript for publication | Preparing a scientific manuscript for publication |
| Lecture 11: Academic writing 2: Scientific language and style | To understand how to write with ‘scientific language and style’ |

**Supplementary material table 2:**: Feedback survey for individual lectures

| **Question** | **Range of responses available** |
| --- | --- |
| What year of medical school are you in? (If not in medical school, don’t answer)? | 1st-6th Year |
| Name of medical school? | Free text |
| Gender? | M/F/Prefer not to say |
| How would you rate the method of teaching delivery (online distance learning)? | 1-5 scale 1 = far worse than in-person 3 = equal to in-person teaching 5= far better than in-person teaching |
| How would you rate the tutorial quality? | Very poor, Poor, Satisfactory, Good, Excellent |
| How challenging was the tutorial? | Far too difficult, Slightly too difficult, About right, Slightly too easy, Far too easy |
| How relevant was this to teaching/ training in Palestine? | 1 = not relevant, 5= very relevant |
| Do you feel this lecture series covers a gap in your medical education, thus far? | Yes, No |
| These lectures were provided based on feedback stating that there was a lack of training on research in the Palestinian medical curriculum. Does this format meet those needs? | Yes, No |
| How could these tutorials be improved? | Free Text |
| What worked well in this tutorial ? | Free Text |
| Can we use this (anonymised) data in future posters, presentations and quality improvement projects ? | Yes, No |

**Supplementary material table 3**: Course evaluation portion of end of course feedback survey

| Question | Range of responses available |
| --- | --- |
| Did the course cover a gap in your medical training thus far? | Yes, No |
| How would you rate the method of teaching delivery (online distance learning)? | 1-5 scale with 1 = far worse than in-person teaching I have received, 3 = equal to in-person teaching I have received, 5= far better than in-person teaching I have received |
| How would you rate the course quality? | Very poor, Poor, Satisfactory, Good, Excellent |
| How challenging was the course? | Far too difficult, slightly too difficult, About right, Slightly too easy, Far too easy |
| How relevant has the course been to teaching/ training in Palestine? | 1 = not relevant, 3= somewhat relevant, 5= very relevant |
| Would you register for future tutorials run by OxPal? | Yes, No |
| Did you have any technological issues with accessing the course? | Free text |
| How could the course be improved? | Free text |
| What worked well with the course? | Free text |
| Do you feel more informed on how medical research is conducted? | 1-5 scale with 1 = I do not feel more informed, 5 = I do feel more informed |
| Has the course made you feel more confident in assisting with a research project? | Yes, No, Maybe |
| What aspect of medical research and audits would you like to be covered in the future? | Free text |
| What have you learnt from the course? | Free text |
| What has the impact of the course been on your studies? | Free text |
| What is your current access to international medical research literature and how do you access it? | Free text |
| Have you previously been involved in conducting research? | Yes, No |
| What teaching have you, or will you receive in the future on evidence based medicine and critical appraisal of medical research? | Yes, No |
| What teaching have you, or will you receive in the future on how to conduct medical research? | Free Text |
| Would you be interested, and have the time, to help with research (such as audits) in Palestine alongside your studies? | Yes, No, Maybe |

**Supplementary material table 4**: University affiliations of course participants

| Region | University | Number of students |
| --- | --- | --- |
| oPt - West Bank | Al-Quds University | 31 |
|  | Najah National University | 4 |
|  | Hebron university | 1 |
| oPt - Gaza | Islamic University of Gaza | 19 |
|  | Al-Azhar university | 27 |
| Egypt | Alexandria University | 2 |
|  | Cairo University | 2 |
|  | Kasr Alainy medical school | 1 |
|  | Faculty of Medicine Ain Shams University | 1 |
| Sudan | Shendi university | 1 |
|  | University of Gezira | 1 |
|  | University of Khartoum, Faculty of Medicine | 1 |
| Syria | Damascus University | 1 |
| Libya | Alfath university of Libya | 1 |
